# Supplementary material for: In-Situ AFM Studies of Surfactant Adsorption on Stainless Steel Surfaces during Electrochemical Polarization
Source: MDPI journal article supplement (doi:10.3390/cmd5020009), 2024-04-07
Supplement: s1 [file s1]

# In-situ AFM Studies of Surfactant Adsorption on Stainless Steel Surfaces during Electrochemical Polarization

Julian Cremer<sup>1,\*</sup>, Sinan Kiremit<sup>2,3</sup>, Heinz Jürgen Klarhorst<sup>2</sup>, Alix Gaspard<sup>4</sup>, Karsten Rasim<sup>4</sup>, Thomas Kordisch<sup>2</sup>, Andreas Hütten<sup>3</sup>, Dario Anselmetti<sup>1</sup>

<sup>1</sup> Department of Experimental Biophysics & Applied Nanoscience, Faculty of Physics, Bielefeld University, 33615 Bielefeld, Germany

<sup>2</sup> Bielefeld Institute for Applied Materials Research, Faculty of Engineering and Mathematics, Hochschule Bielefeld University of Applied Sciences and Arts, Interaktion 1, 33619 Bielefeld, Germany

<sup>3</sup> Department of Thin Films and Physics of Nanostructures, Center of Spinelectronic Materials and Devices, Faculty of Physics, Bielefeld University, 33615 Bielefeld, Germany

<sup>4</sup> Center for Materials, Business Unit Laundry, R&D, Miele & Cie. KG, 33332 Gütersloh, Germany

\* Correspondence: jcremer@physik.uni-bielefeld.de

## Supporting Information

**Table S1.** Corrosion current densities  $j_{\text{corr}}$  of the 1.4510 stainless steel, without surfactants 0xCMC and with increasing concentration of FAES, LAS and PKO in NaCl solution (500 mg/L Cl<sup>-</sup> and pH 5.9 at 30°C).

| CMC FAES | $j_{\text{corr}}$ [ $\mu\text{A}/\text{cm}^2$ ] | $\Delta j_{\text{corr}}$ [ $\mu\text{A}/\text{cm}^2$ ] |
|----------|-------------------------------------------------|--------------------------------------------------------|
| 0x       | 0.074                                           | 0.003                                                  |
| 1x       | 0.086                                           | 0.015                                                  |
| 2x       | 0.040                                           | 0.012                                                  |
| 4x       | 0.090                                           | 0.042                                                  |
| 8x       | 0.213                                           | 0.246                                                  |
| 16x      | 0.078                                           | 0.041                                                  |
| 32x      | 0.164                                           | 0.045                                                  |
| 160x     | 0.236                                           | 0.026                                                  |
|          |                                                 |                                                        |
| CMC LAS  | $j_{\text{corr}}$ [ $\mu\text{A}/\text{cm}^2$ ] | $\Delta j_{\text{corr}}$ [ $\mu\text{A}/\text{cm}^2$ ] |
| 0x       | 0.074                                           | 0.003                                                  |
| 1x       | 0.388                                           | 0.097                                                  |
| 2x       | 0.322                                           | 0.233                                                  |
| 4x       | 0.125                                           | 0.028                                                  |
| 8x       | 0.146                                           | 0.061                                                  |
| 16x      | 0.103                                           | 0.012                                                  |
| 32x      | 0.090                                           | 0.009                                                  |
| 160x     | 0.052                                           | 0.019                                                  |
|          |                                                 |                                                        |
| CMC PKO  | $j_{\text{corr}}$ [ $\mu\text{A}/\text{cm}^2$ ] | $\Delta j_{\text{corr}}$ [ $\mu\text{A}/\text{cm}^2$ ] |

|      |       |       |
|------|-------|-------|
| 0x   | 0.074 | 0.003 |
| 8x   | 0.124 | 0.048 |
| 10x  | 0.046 | 0.030 |
| 20x  | 0.034 | 0.005 |
| 40x  | 0.034 | 0.006 |
| 80x  | 0.048 | 0.012 |
| 160x | 0.066 | 0.007 |

The recorded current over time of the in-situ AFM measurement are depicted in Figure S1-3. For potential differences below the  $E_{bd}$ , the current density remains nearly constant. As described before and depicted in the Figures, the stainless steel was imaged with the AFM while the voltage was applied as long as the current stayed constant and after the current increased significantly. It was no or no additional adsorption of surfactants detectable until the current density increased significantly. The data were plotted with a Bezier curve to smooth the noise using the open source software gnuplot.

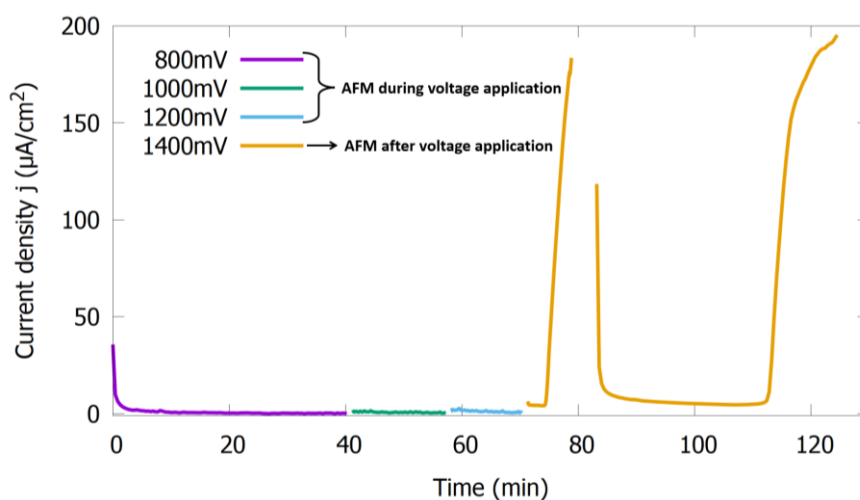

**Figure S1.** Current density over time of the 1.4510 in NaCl solution (500 mg/L  $\text{Cl}^-$  and pH 5.9 at 30°C) with FAES at 16xCMC in the AFM electrochemical cell at different potential differences vs. Ag/AgCl.

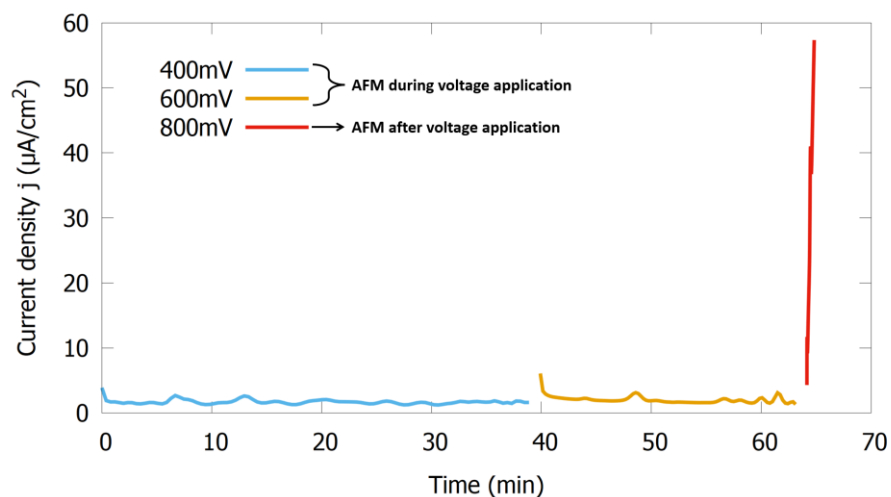

**Figure S2.** Current density over time of the 1.4510 in NaCl solution (500 mg/L Cl<sup>-</sup> and pH 5.9 at 30°C) with PKO at 16xCMC in the AFM electrochemical cell at different potential differences vs. Ag/AgCl.

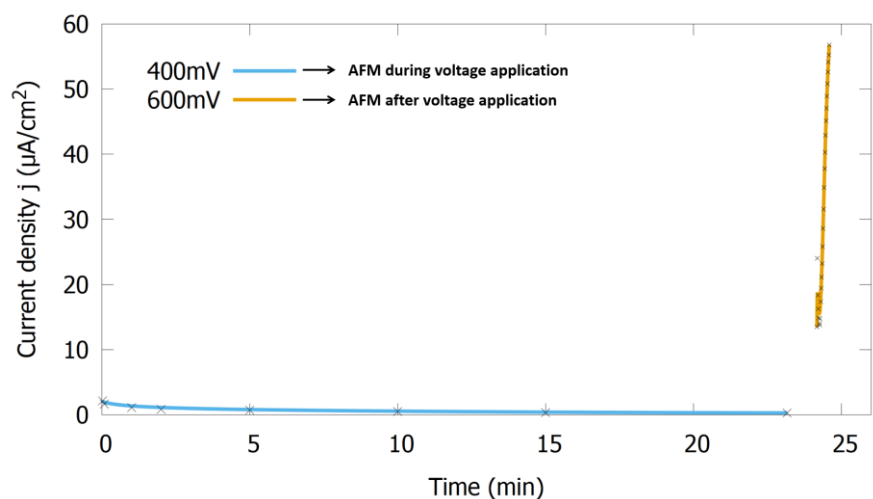

**Figure S3.** Current density over time of the 1.4510 in NaCl solution (500 mg/L Cl<sup>-</sup> and pH 5.9 at 30°C) with PKO at 8xCMC in the AFM electrochemical cell at different potential differences vs. Ag/AgCl.

SEM investigations were performed to identify the precipitates as titanium carbon-nitrides. The EDS spectra in Figure S1 identified precipitates with a much higher nitrogen than carbon content. These titanium nitrides can also be identified under a light microscope due to their yellowish colour. Such precipitates were investigated with the AFM. The used SEM was a Sigma 300 VP (Carl Zeiss AG, Oberkochen, Germany). Energy dispersive X-ray spectroscopy (EDS) spectra were recorded with an X-Max 80 mm<sup>2</sup> (Oxford Instruments, Abingdon, England).

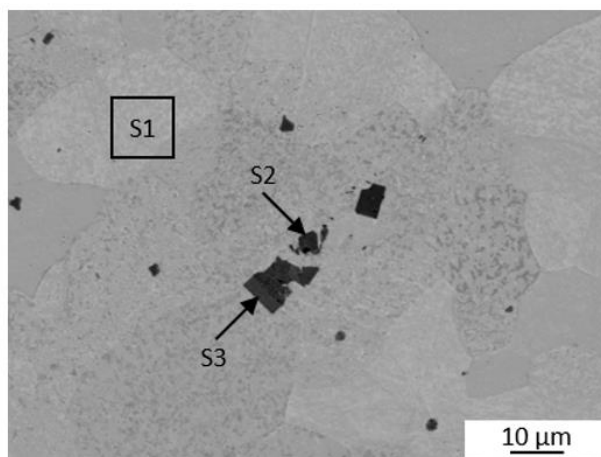

|    | Fe    | Cr    | Ti    | C    | N     | O    | Si   |
|----|-------|-------|-------|------|-------|------|------|
| S1 | 79.54 | 17.56 | 0.4   | 2.07 | -     | -    | 0.42 |
| S2 | 0.82  | 1.4   | 71.88 | 1.27 | 19.75 | 4.88 | -    |
| S3 | 1.17  | -     | 73.66 | 1.2  | 19.61 | 4.36 | -    |

**Figure S4.** SEM image of the polished 1.4510 with titanium precipitated. EDS spectra present the percentage composition of the steel matrix (S1) and two titanium nitride precipitates (S2,S3).

Figure S5 presets the PKO multilayer formation at 20xCMC with a surface coverage of about 45%.

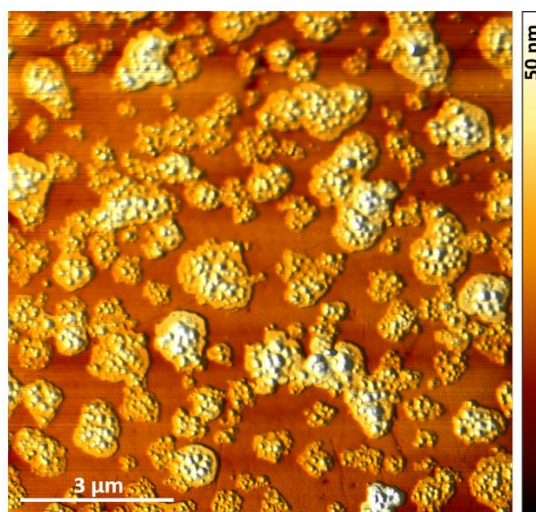

**Figure S5.** AFM height image of 1.4510 steel surface in NaCl solution (500 mg/L  $\text{Cl}^-$  and pH 5.9 at 30°C) with PKO at 20xCMC after immersion showing multilayer formation.
